# Supplementary material
Source: publisher site journal article supplement (https://www.dovepress.com/article/338967)
Supplement: Supplementary file 1 [file get_supplementary_file.php]

Appendix Table1 List of comorbidity for Charlson Comorbidity Index

| Charlson Comorbidity | Assigned weights for diseases | |
| --- | --- | --- |
| NO | YES |
| Myocardial infarction | 0 | 1 |
| Congestive heart failure | 0 | 1 |
| Peripheral vascular disease | 0 | 1 |
| Cerebrovascular disease | 0 | 1 |
| Dementia | 0 | 1 |
| Peptic injury disease | 0 | 1 |
| Chronic Pulmonary disease | 0 | 1 |
| Rheumatic disease | 0 | 1 |
| Diabetes(end-organ damage) | 0 | 2 |
| Diabetes(uncomplicated) | 0 | 1 |
| Moderate or severe renal disease | 0 | 2 |
| Hemiplegia/paraplegia | 0 | 2 |
| Liver disease(mild) | 0 | 1 |
| Liver disease ( severe) | 0 | 3 |
| Any malignancy , including lymphoma and leukemia | 0 | 2 |
| Metastatic solid tumor | 0 | 6 |
| AIDS/HIV | 0 | 6 |
| Age | | |
| <50 years |  | 0 |
| 50-59 years |  | 1 |
| 60-69 years |  | 2 |
| 70-79 years |  | 3 |
| ≥80 years |  | 4 |

**Note:** liver disease and diabetes inputs are mutually exclusive (e.g. do not give points for both "mild liver disease" and "moderate or severe liver disease").
